# Supplementary material for: CCT3- LINC00326 axis regulates hepatocarcinogenic lipid metabolism
Source: HighWire-hosted journal article supplement (doi:10.1136/gutjnl-2021-325109), 2022-01-12
Supplement: gutjnl-2021-325109supp003_data_supplement.pdf [file gutjnl-2021-325109supp003_data_supplement.pdf]

## Supplemental Material

### “The CCT3-*LINC00326* axis regulates hepatocarcinogenic lipid metabolism”

Søndergaard *et al.*

---

#### SUPPLEMENTARY FIGURES

Figure S1. Molecular characteristics of RBPs in HCC

Figure S2. Survival analysis of the TCGA-LIHC cohort

Figure S3. Estimation of hazard ratio and HCC patient survival based on RBP gene expression

Figure S4. siRNA transfection efficiency and RBP-KD perturbation effects in human HCC cells

Figure S5. Gene Ontology (GO) and KEGG analyses of deregulated genes upon RBP-KD

Figure S6. Cellular and molecular phenotype assessment upon lincRNA-OE

Figure S7. GO and KEGG analyses of deregulated genes upon OE

Figure S8. CCT3 works in a chaperoning-independent manner to interact with *LINC00326*

Figure S9. GO and KEGG analyses of deregulated genes shared upon RBP-KD and lincRNA OE

Figure S10. *LINC00326* is highly expressed in healthy testis and diminished upon cancer progression

Figure S11. Molecular model for *LINC00326* regulating lipid metabolism-associated gene expression

#### SUPPLEMENTARY TABLES

Table S1. hRBP list

Table S2. TCGA LIHC DEG

Table S3. AUS counts

Table S4. AUS DEG

Table S5. RBP KD RNAseq raw counts

Table S6. RBP KD RNAseq TPM

Table S7. RBP KD RNAseq DEG

Table S8. RBP KD RNAseq GO KEGG

Table S9. novel genes info

Table S10. lincRNA OE RNAseq raw counts

Table S11. lincRNA OE RNAseq TPM

Table S12. lincRNA OE RNAseq DEG

Table S13. lincRNA OE and RBP overlap GO KEGG

Table S14. Primer list

Supplementary tables and microscopic imaging files are accessible via Figshare:

<https://figshare.com/s/2c05765158269b3b4ff2>

<https://figshare.com/s/a83dbec52555e922ca8d>

<https://figshare.com/s/08b0f84f2ea241b03c8d>

#### SUPPLEMENTARY MATERIALS & METHODS

Cell-based and molecular assays as well as xenograft experiments are described in the supplementary materials and methods.

#### ARRAYEXPRESS ACCESSION

Australian HCC patient cohort RNA-seq: E-MTAB-8915

RBP-KD RNA-seq: E-MTAB-9587

lincRNA-OE RNA-seq: E-MTAB-9586

#### CODE ACCESSIBILITY

[github.com/jonasns/LiveRNome](https://github.com/jonasns/LiveRNome)
